# Supplementary material for: Substrate Preferences of Ruderal Plants in Colonizing Stone Monuments of the Pasargadae World Heritage Site, Iran
Source: MDPI journal article supplement (doi:10.3390/su13169381), 2021-08-20
Supplement: s1 [file s1]

**Table S1.** Substrate factors and management activities in Pasargadae, as influencing factors for the plant colonization.

| Monuments      | Stone Surfaces<br>(Estimated m <sup>2</sup> ) ° |      | Observed Microsites °° |     |     |     |    |     |     |    |   |   | Management Activities ° |
|----------------|-------------------------------------------------|------|------------------------|-----|-----|-----|----|-----|-----|----|---|---|-------------------------|
|                | BS                                              | GGs  | M1a                    | M1b | M2a | M2b | M3 | M4a | M4b | M5 | I | D |                         |
| Cyrus Tomb     | 186                                             | -    | -                      | *   | *   | -   | *  | *   | *   | *  | - | * | *                       |
| Caravanserai   | 1120                                            | -    | *                      | -   | -   | -   | *  | -   | -   | -  | * | * | -                       |
| Private Palace | 656                                             | 642  | *                      | *   | *   | *   | *  | *   | *   | *  | - | - | *                       |
| Watercourses   | -                                               | 646  | *                      | -   | *   | *   | *  | *   | -   | *  | - | - | -                       |
| Pavilion B     | -                                               | 158  | *                      | -   | *   | *   | *  | -   | -   | -  | - | - | *                       |
| Pavilion A     | -                                               | 223  | *                      | -   | *   | *   | *  | -   | -   | -  | - | - | -                       |
| Audience Hall  | 410                                             | 1962 | *                      | *   | *   | *   | *  | *   | *   | *  | - | - | *                       |
| Gatehouse      | 50                                              | 640  | *                      | *   | *   | *   | *  | *   | *   | *  | - | - | *                       |
| Stone Tower    | 163                                             | -    | *                      | *   | *   | *   | *  | *   | *   | *  | * | * | -                       |

° Archive of the Pasargadae research center; °° presence; (\*) absence; (-) as observed in the field.
